# Supplementary material for: Development and validation of QRISK3 risk prediction algorithms to estimate future risk of cardiovascular disease: prospective cohort study
Source: PubMed Central journal article supplement (PMC5441081; doi:10.1136/bmj.j2099), 2017-05-24
Supplement: hipj036510.wf1.pdf [file hipj036510.wf1.pdf]

### Hazard ratios by age in men and women

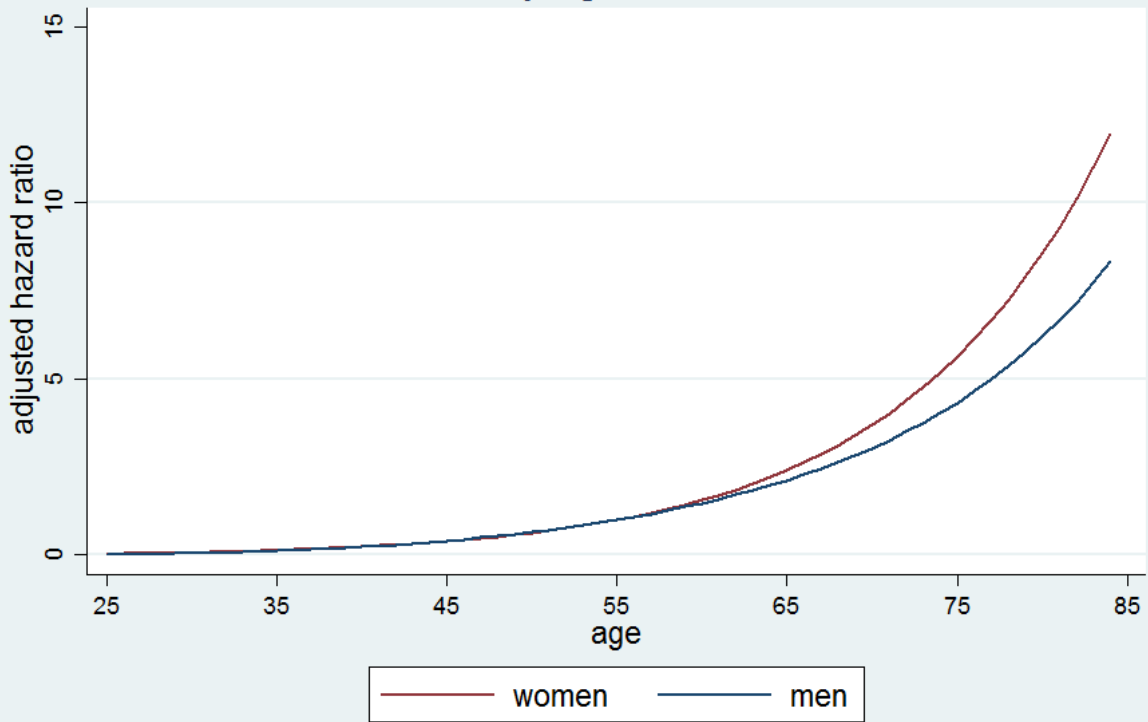

hazard ratios compared with age=55

### Hazard ratios by body mass index in men and women

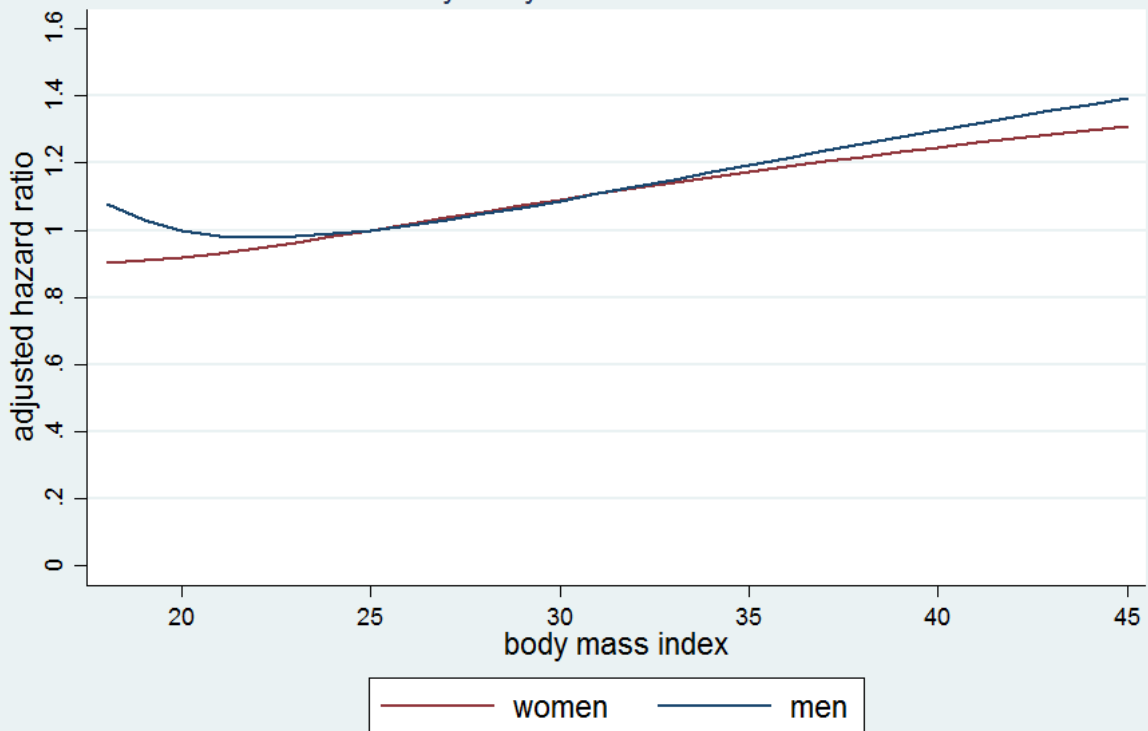

hazard ratios compared with bmi=25

### Hazard ratios by age in men

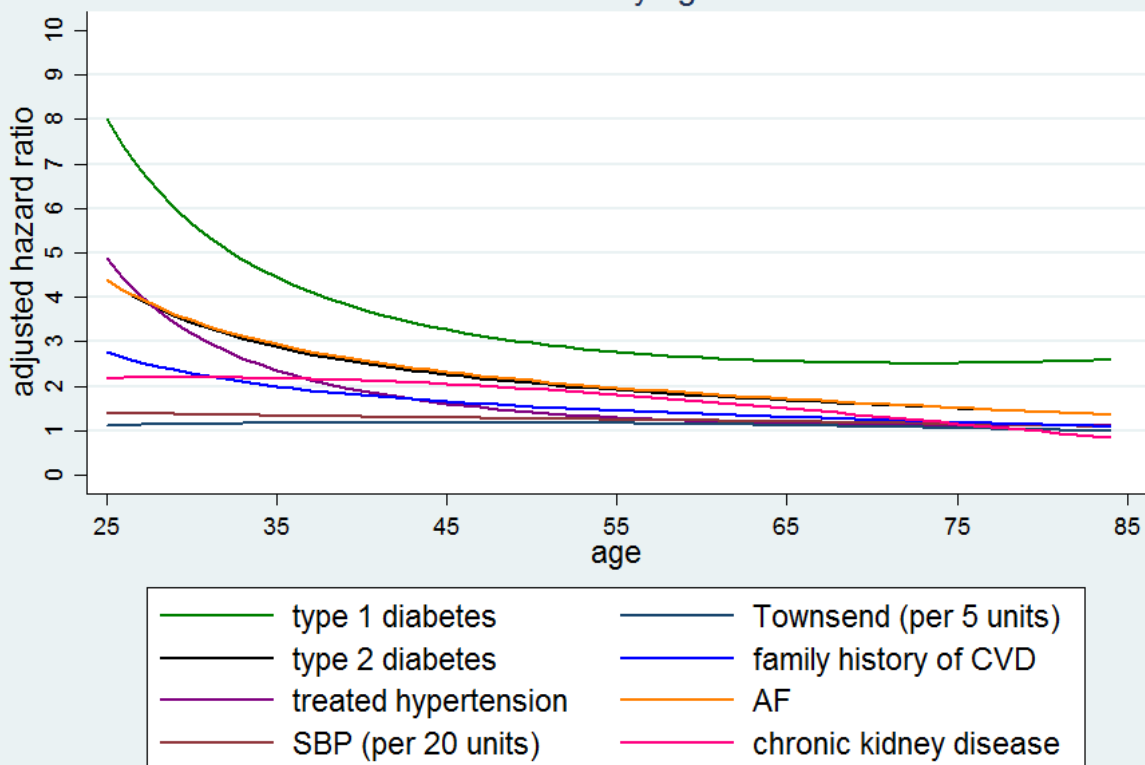

### Hazard ratios by age in women

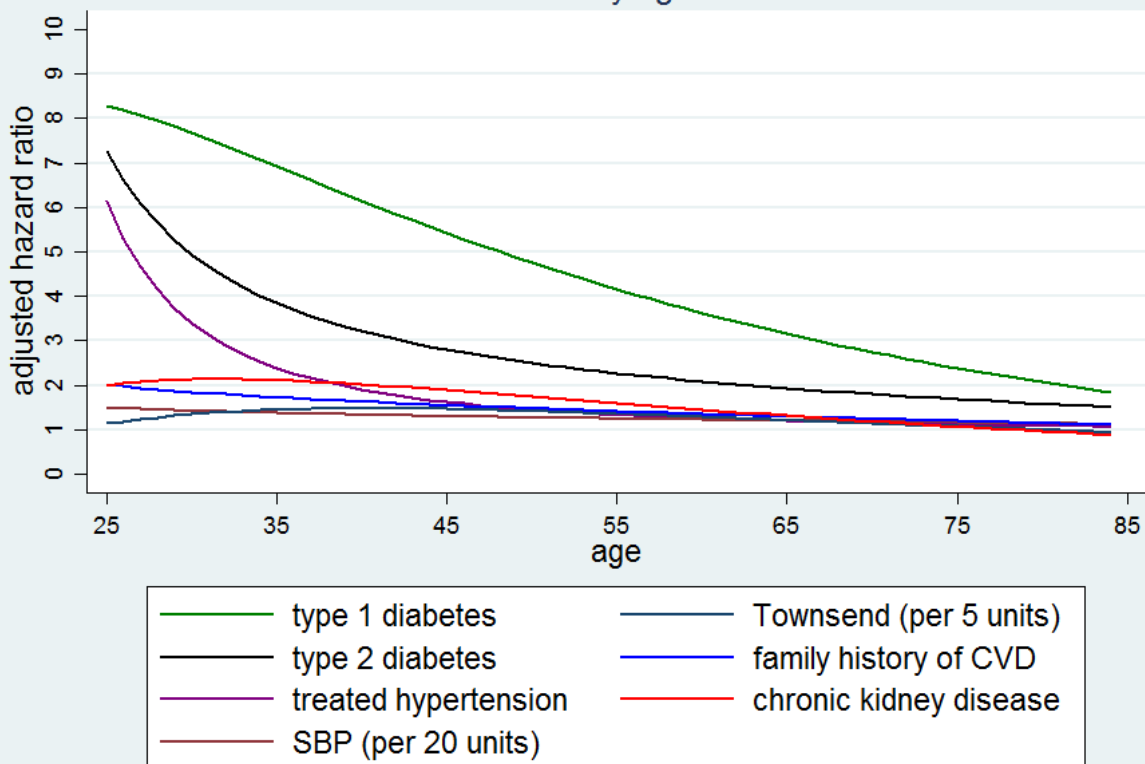

Hazard ratios by age in men

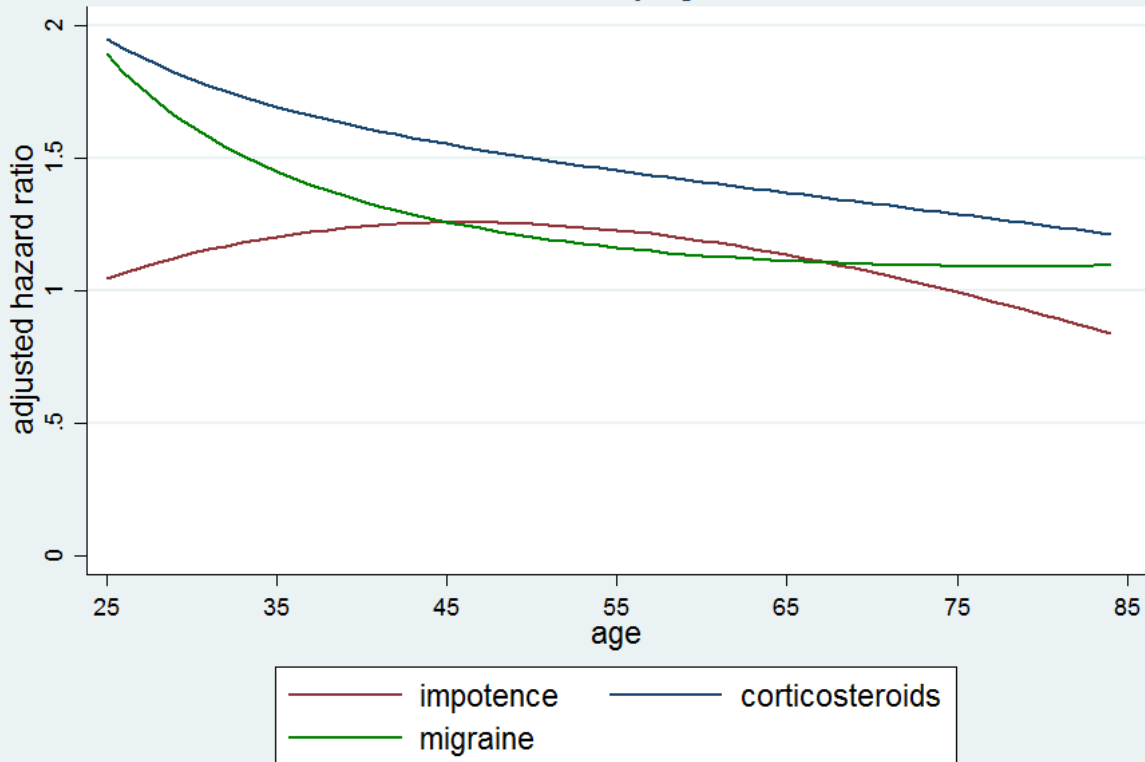

Hazard ratios by age in women

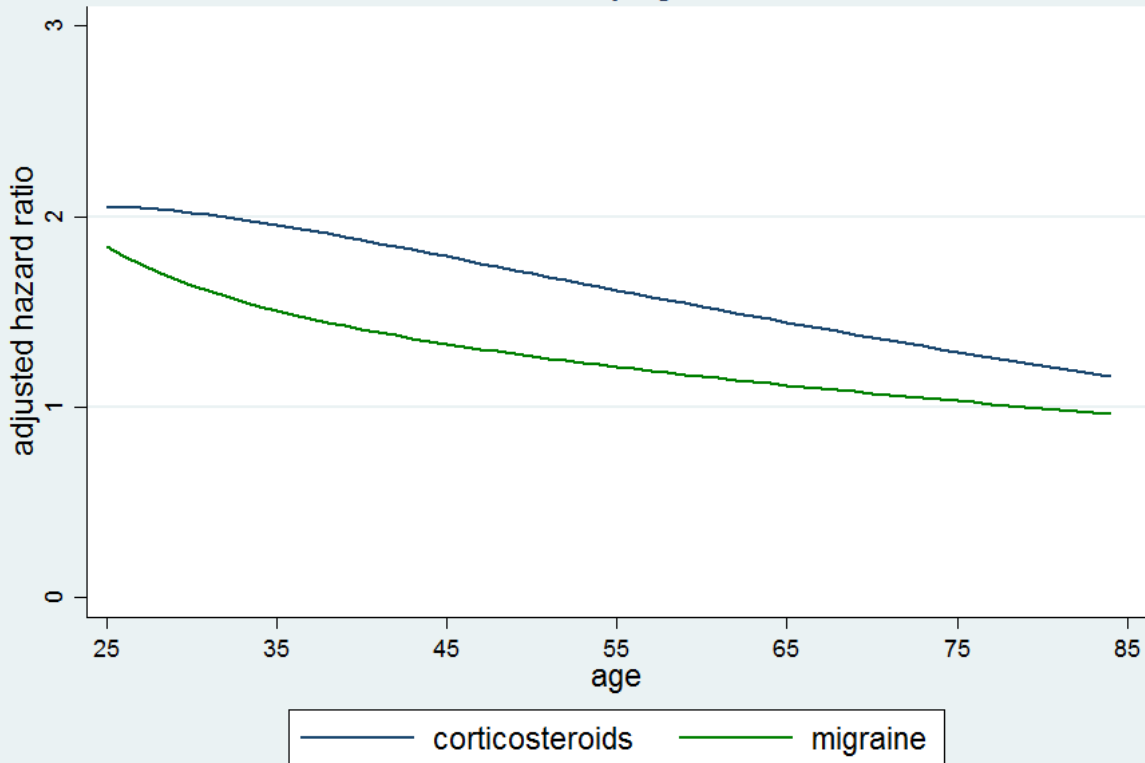

Hazard ratios for SLE and atrial fibrillation by age in women

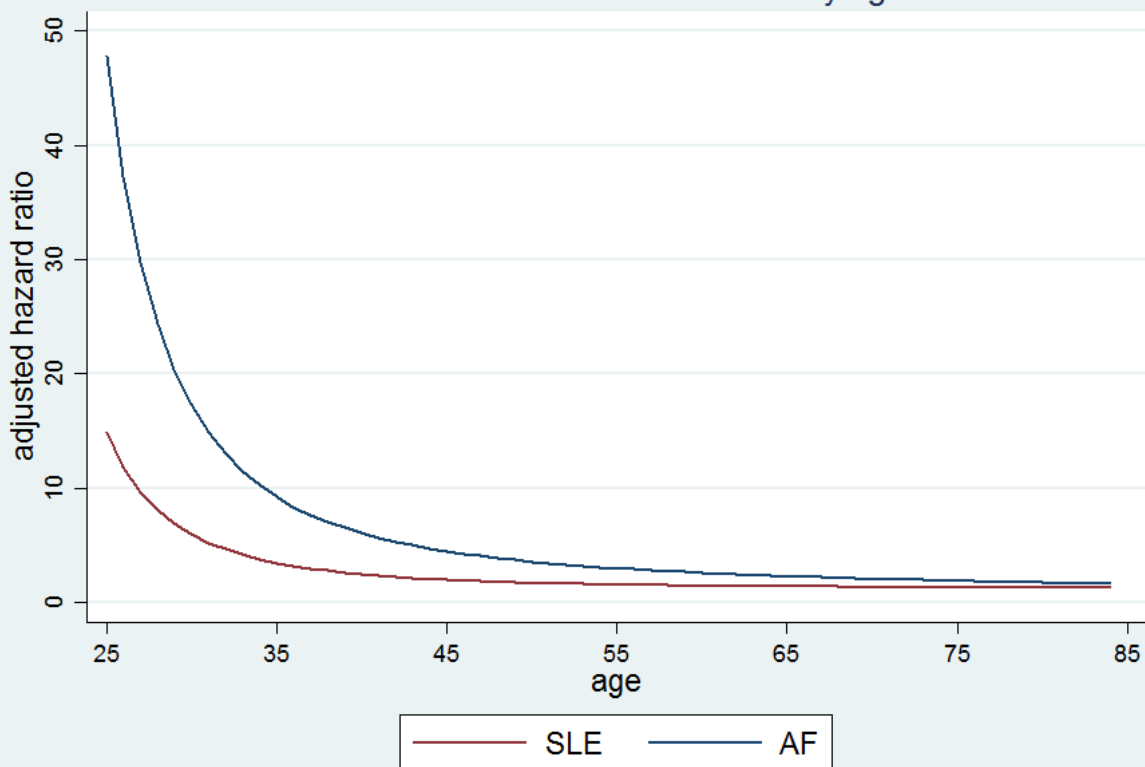

Hazard ratios by age for smoking in women

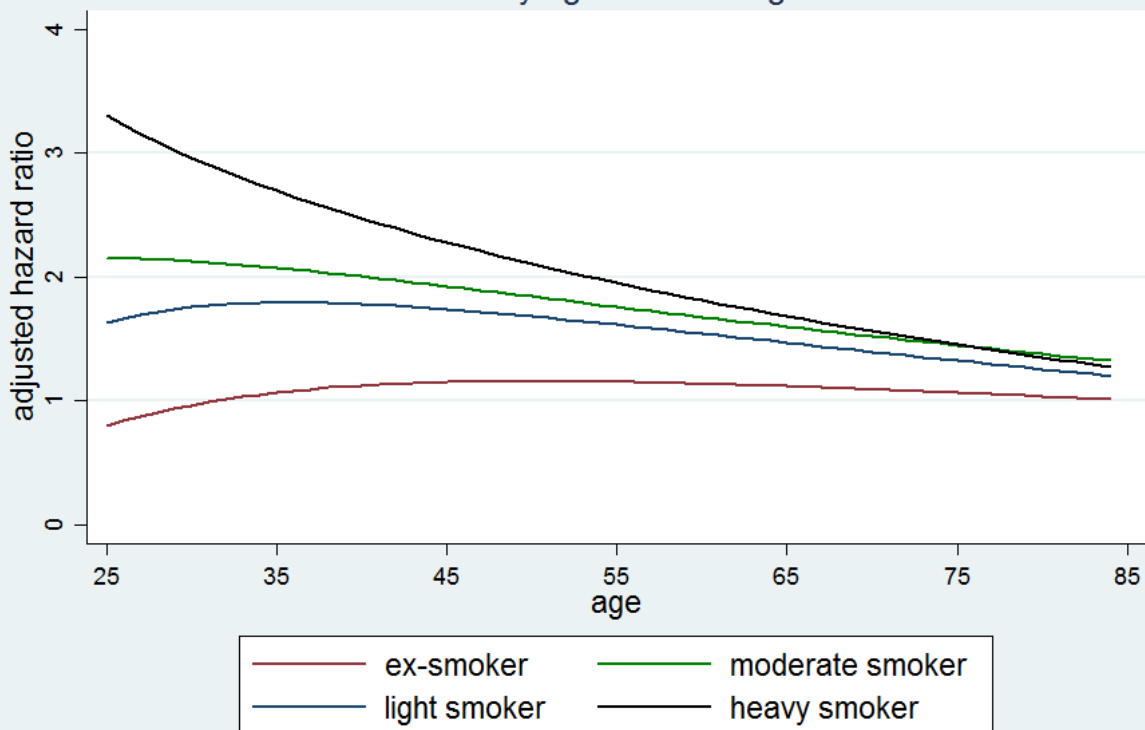

hazard ratios compared to non-smokers

Hazard ratios by age for smoking in women

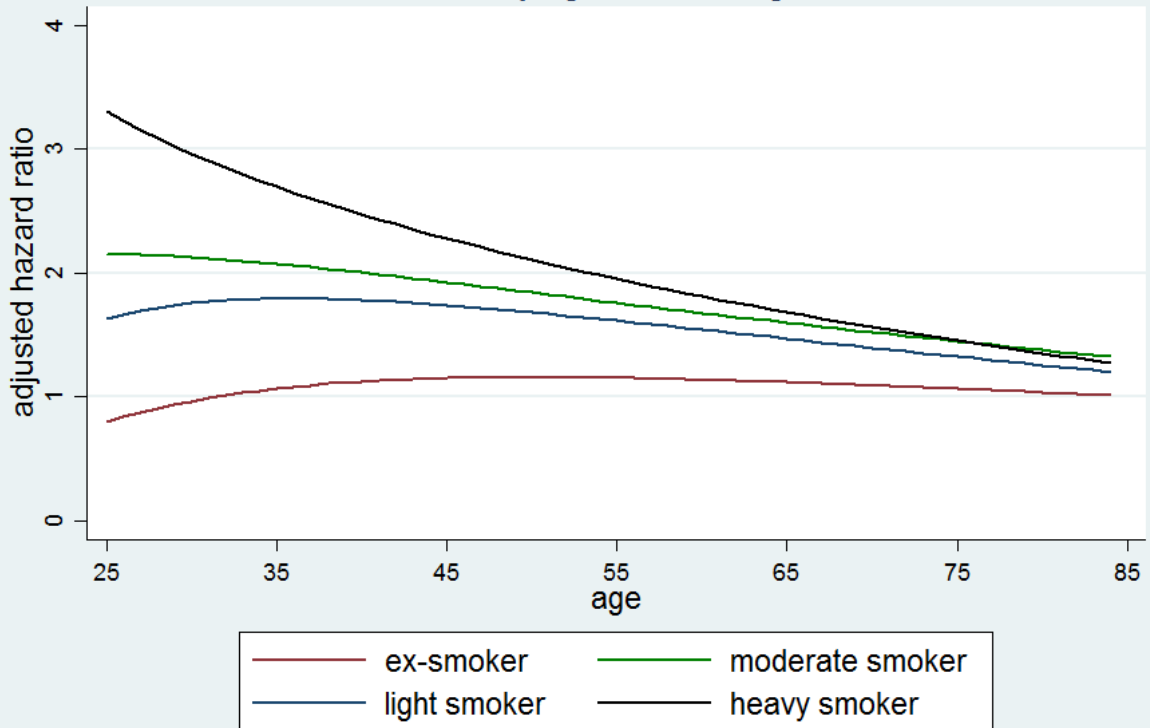

hazard ratios compared to non-smokers

Hazard ratios by age for smoking in men

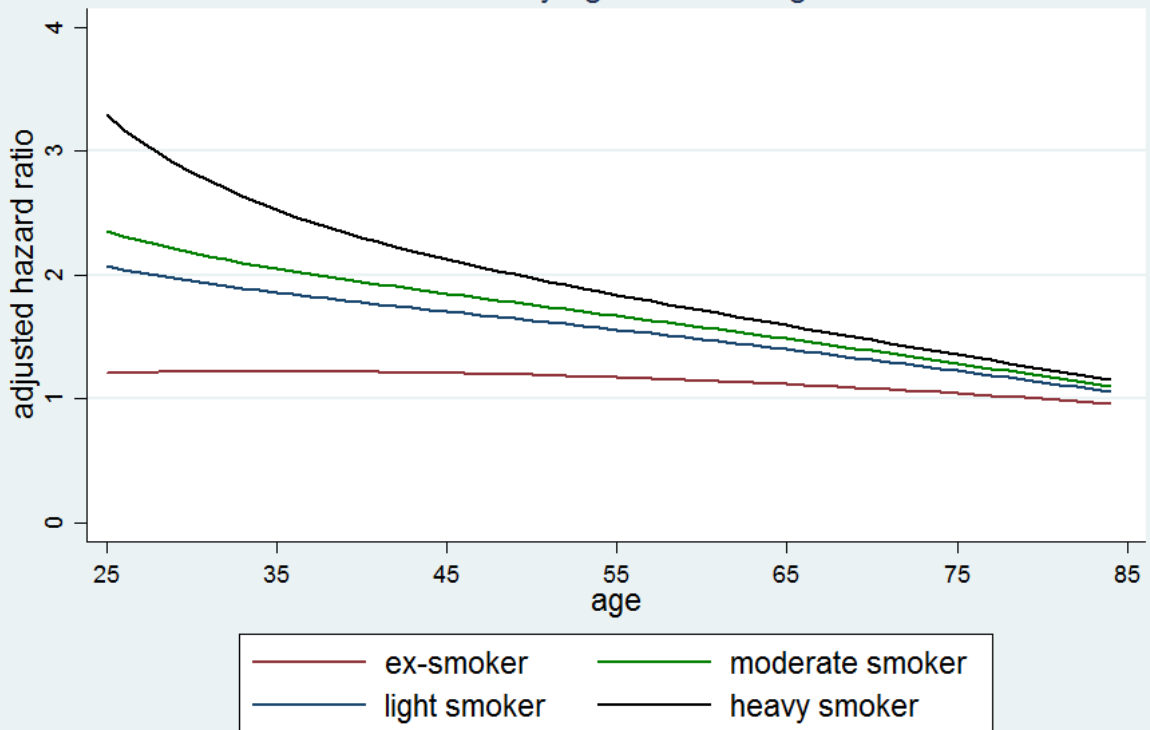

hazard ratios compared to non-smokers

Hazard ratios by age for smoking in women



hazard ratios compared to non-smokers

Hazard ratios by age for smoking in men



hazard ratios compared to non-smokers
